# Supplementary material
Source: Royal Society of Chemistry journal article supplement (doi:10.1039/d6qi00061d)
Supplement: d6qi00061d1.pdf [file d6qi00061d1.pdf]

## Support Information

### **Ferrocenyl Carboxylate-Mediated Electrode/Electrolyte Dual-Phase Molecule Engineering for Efficient and Durable Electrochemical Oxygen Evolution Reaction**

Xuetong Zhang, Chong Lin\*, Ye Tan, Cuiping Zeng, Xinyi Luo, Hongshun Deng, Ke Li, Min Li, Jingyang Tian\*, Minghui Cao\*

---

<sup>a</sup> *Jiangxi Province Key Laboratory of Functional Organic polymers, School of Chemistry and Materials Science, East China University of Technology, Nanchang, 330013, Jiangxi, P. R. China.*

## Experimental Details

### Reagents and Materials

Metal precursor of nickel nitrate hexahydrate ( $\text{Ni}(\text{NO}_3)_2 \cdot 6\text{H}_2\text{O}$ , 99.5%) was supplied by Shanghai Aladdin Biochemical Technology Co., Ltd. Organic alkali of hexamethylenetetramine (HMT, 99.5%) was provided by Shanghai Titan Scientific Co., Ltd. Electrolyte of potassium hydroxide (KOH, 95%) was obtained from Shanghai Macklin Biochemical Co., Ltd. Sulfur source of thiourea ( $\text{CH}_4\text{N}_2\text{S}$ , 99%) and selenium source of selenium powder (Se, 99.9%) were purchased from Beijing InnoChem Science & Technology Co., Ltd. The modifier of 1,1'-Ferrocenedicarboxylic acid ( $\text{H}_2\text{FeC}_{12}\text{H}_{10}\text{O}_4$ , FcDA,  $\geq 98.0\%$ ) was obtained from TCI (Shanghai) Development Co., Ltd. The solvents of anhydrous methanol (AR), anhydrous ethanol (AR), N, N-dimethylformamide (DMF, AR) were supplied by Xilong Technology Co., Ltd. All analytical reagent grade chemicals are commercially available without further purification. Carbon cloth (CC, WOS1009, thickness: 0.33 mm) was purchased from CeTech Co. Ltd.

### Material preparation

#### Preparation of $\text{Ni}(\text{OH})_2$ NAs

1 mmol  $\text{Ni}(\text{NO}_3)_2 \cdot 6\text{H}_2\text{O}$  and 2 mmol HMT were dissolved in 30 mL anhydrous methanol. The solution was then transferred into a Teflon lining (100 mL), and a piece of washed CC or NF (3 cm  $\times$  3 cm) was put into the solution. Subsequently, the Teflon-lined stainless-steel autoclave was heated at 120 °C for 24 h. The obtained  $\text{Ni}(\text{OH})_2$  NAs were washed with deionized water and anhydrous ethanol several times, and were dried at 60 °C for further use.

#### Preparation of $\text{Ni}(\text{OH})_2$ -FcDA NAs

In a typical preparation of  $\text{Ni}(\text{OH})_2$ -FcDA NAs, moderate FcDA was ultrasound dissolved in the mix solvents of 8 mL DMF and 4 mL  $\text{H}_2\text{O}$ . Then, the solution was transferred into a 25 mL Teflon-lined stainless-steel autoclave. At the same time, a piece of as-prepared  $\text{Ni}(\text{OH})_2$  NAs (3 cm  $\times$  1 cm) were placed in the solution. Then, the autoclave was heated to 125 °C for 24 h. The obtained  $\text{Ni}(\text{OH})_2$ -FcDA NAs were washed with deionized water and ethanol several times, and were dried at 60 °C for further use.

### Materials characterizations

The structure of the samples was characterized by X-ray diffraction (XRD) (Bruker AXS D8 Advance) with Cu  $K\alpha$  radiation. Fourier transform infrared spectroscopy

(FTIR, Thermo Nicolet iS50 FT-IR spectrometer) was used to qualitatively analyze the functional groups. The resolution and total scan numbers were  $4\text{ cm}^{-1}$  and 64, respectively. The morphologies of the samples were characterized by field emission scanning electron microscopy (FE-SEM, Nova Nano SEM 450) and transmission electron microscopy (TEM, Tecnai G2 F20 S-Twin). Raman spectroscopy studies were conducted using a Renishaw inVia ReflexRaman microscope equipped with a 532 nm laser source. The energy dispersive X-ray spectroscopy (EDX) was used for elemental analysis. X-ray photoelectron spectroscopy (XPS) was recorded on a X-ray photoelectron spectrometer (Thermo Fisher ESCALAB Xi+ spectrometer) with Al K $\alpha$  X-ray source.

### **Electrochemical measurements**

All the electrochemical measurements were tested by a CHI 760E electrochemical workstation at room temperature ( $25\text{ }^{\circ}\text{C}$ ). A standard three-electrode system was used in all the electrochemical tests. A Pt plate and a Hg/HgO electrode (in 1 M KOH) were used as the counter and reference electrodes, respectively. Ni(OH) $_2$  NAs and Ni(OH) $_2$ -FcDA NAs ( $0.5\text{ cm} \times 1.0\text{ cm}$ ) were used as the working electrodes. The electrolyte was 1 M KOH with or without  $25\text{ }\mu\text{M}$  FcDA, which was degassed by bubbling oxygen for 30 min before measurements. All potentials were referenced to a reversible hydrogen electrode (RHE) using the equation:  $E_{\text{vs.RHE}} = E_{\text{vs.Hg/HgO}} + 0.098\text{ V} + 0.059 \times \text{pH}$ . All linear sweep voltammetry (LSV) data for OER performance evaluation were acquired via a reverse scan (from high to low potential) at a scan rate of  $5\text{ mV s}^{-1}$ . The reverse scan direction was deliberately chosen to avoid the interference of the oxidation current from Ni $^{2+}$ /Ni $^{3+}$  redox processes on the intrinsic water oxidation current, thereby providing a more accurate assessment of the OER activity. All LSV data presented are with positive feedback iR compensation (95% compensation) applied, and this compensation procedure was applied consistently to all tested samples and under all electrolyte conditions. The overpotential at  $10\text{ mA cm}^{-2}$  ( $\eta_{10}$ ) was calculated as  $\eta_{10} = E_{\text{vs.RHE}@10\text{ mA cm}^{-2}} - 1.23\text{ V}$ . The Tafel slope was derived by fitting the  $\eta$  vs.  $\log(j)$  plot with the Tafel equation ( $\eta = b \log j + a$ ). Electrochemically active surface area (ECSA) was estimated from the double-layer capacitance ( $C_{\text{dl}}$ ) measured via cyclic voltammetry (CV) in a non-Faradaic potential region (1.0-1.1 V vs. RHE) at various scan rates ( $100\text{-}5000\text{ mV s}^{-1}$ ). Chronopotentiometry (CP) tests were performed at a constant current density of  $10\text{ mA cm}^{-2}$ .

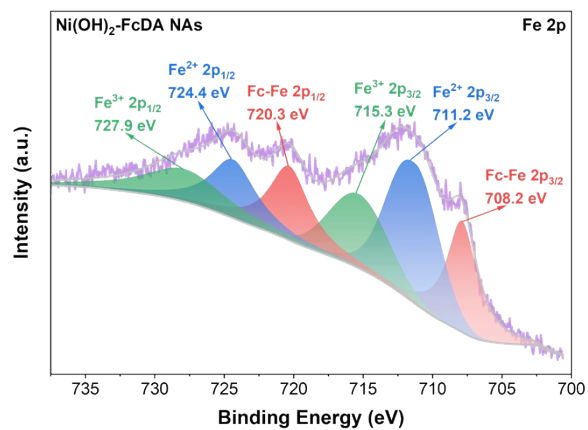

**Figure S1.** XPS of Fe 2p in Ni(OH)<sub>2</sub>-FcDA NAs.

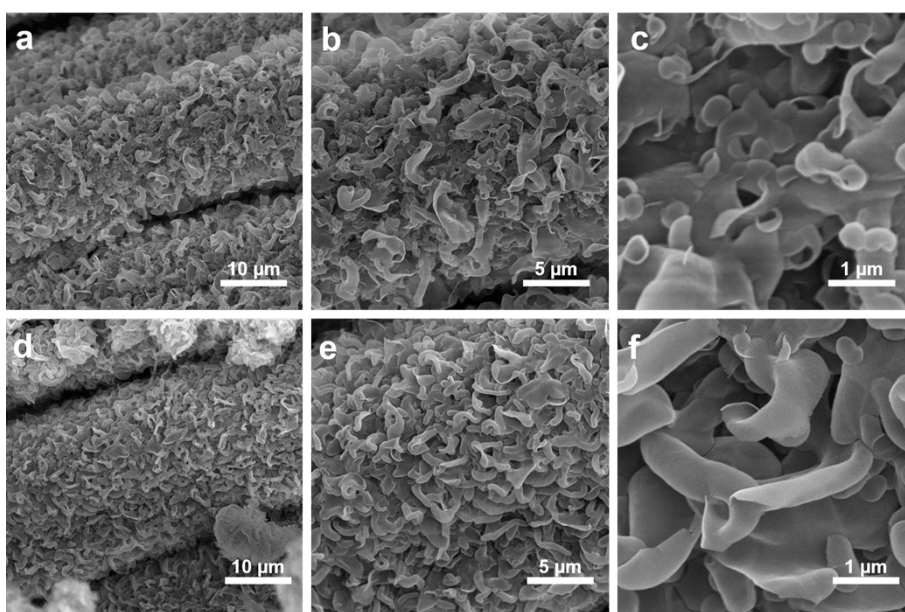

**Figure S2.** SEM images of (a-c) Ni(OH)<sub>2</sub> NAs, (d-f) Ni(OH)<sub>2</sub>-FcDA NAs, respectively.

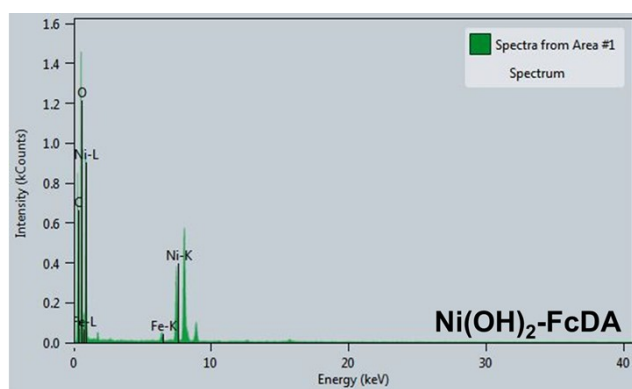

**Figure S3.** EDS plots of (a) Ni(OH)<sub>2</sub>-FcDA.

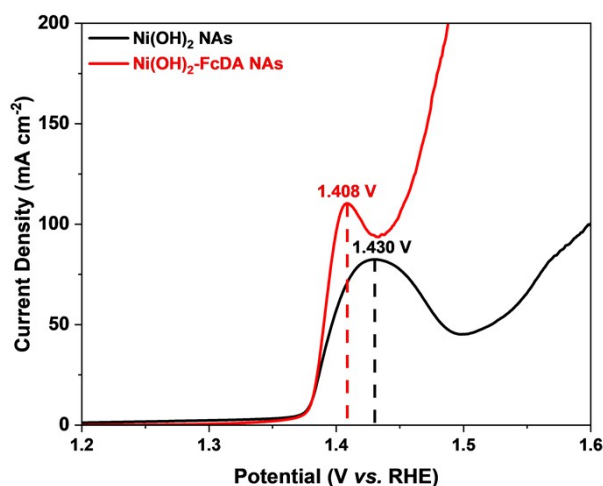

**Figure S4.** Forward scanned LSV curves of (a-c)  $\text{Ni}(\text{OH})_2$  NAs, and (d-f)  $\text{Ni}(\text{OH})_2$ -FcDA NAs under the electrolyte of 1 M KOH.

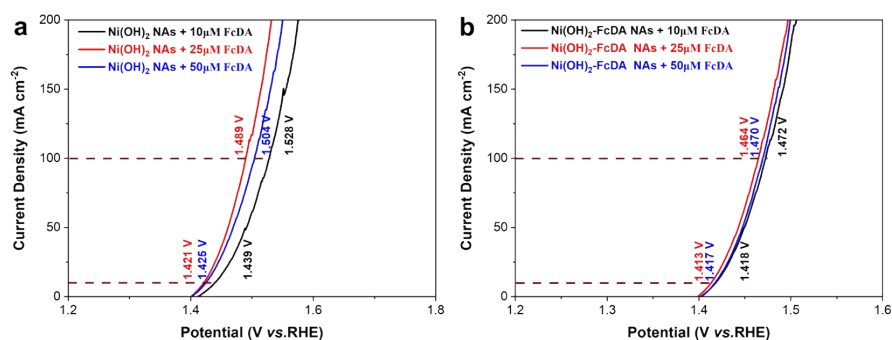

**Figure S5.** LSV curves of  $\text{Ni}(\text{OH})_2$  NAs and  $\text{Ni}(\text{OH})_2$ -FcDA NAs at different FcDA concentration in 1M KOH.

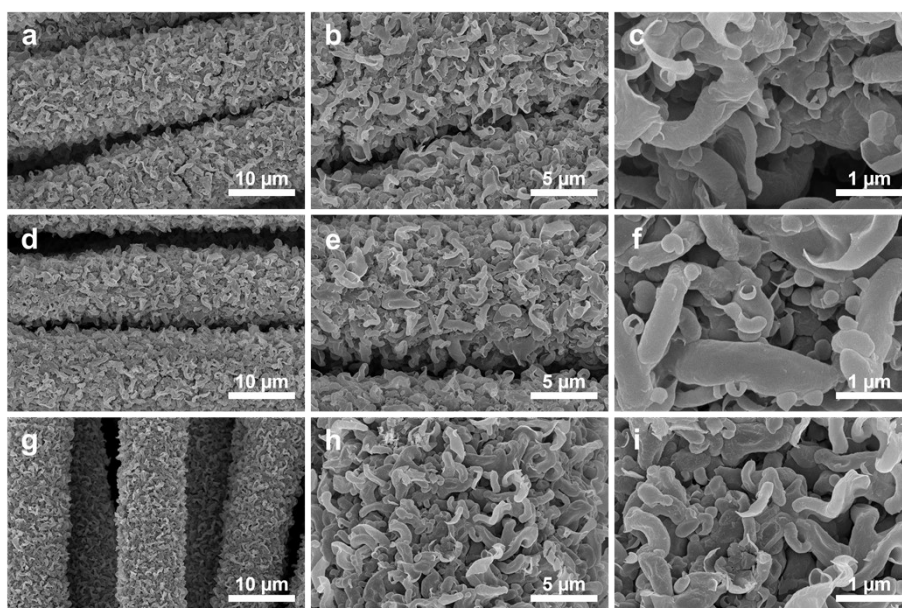

**Figure S6.** SEM images of  $\text{Ni}(\text{OH})_2$  NAs following activation in 1 M KOH solution for 2 hours, with the inclusion of 10  $\mu\text{M}$  (a-c), 25  $\mu\text{M}$  (d-f), and 50  $\mu\text{M}$  (g-i) FcDA.

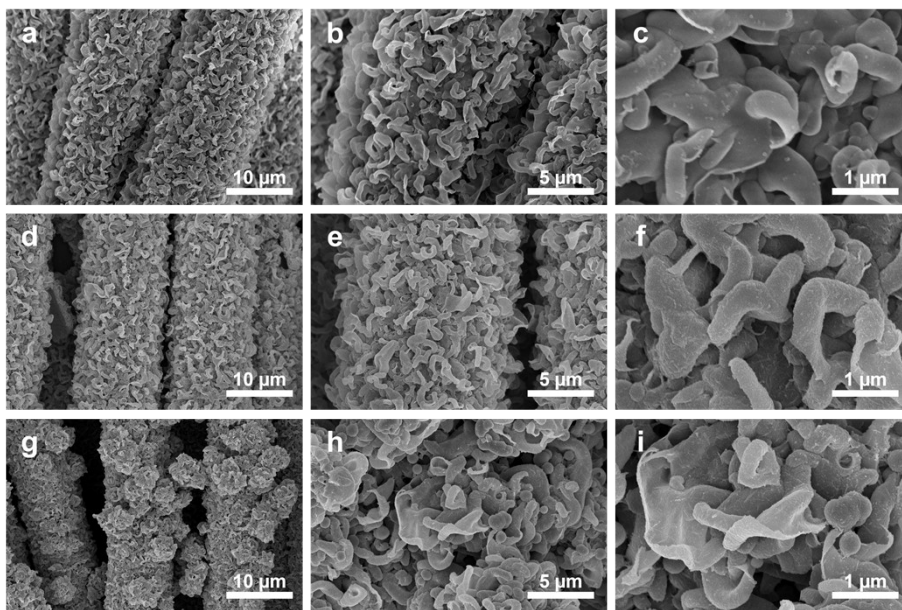

**Figure S7.** SEM images of Ni(OH)<sub>2</sub>-FcDA NAs following activation in 1 M KOH solution for 2 hours, with the inclusion of 10 μM (a–c), 25 μM (d–f), and 50 μM (g–i) FcDA.

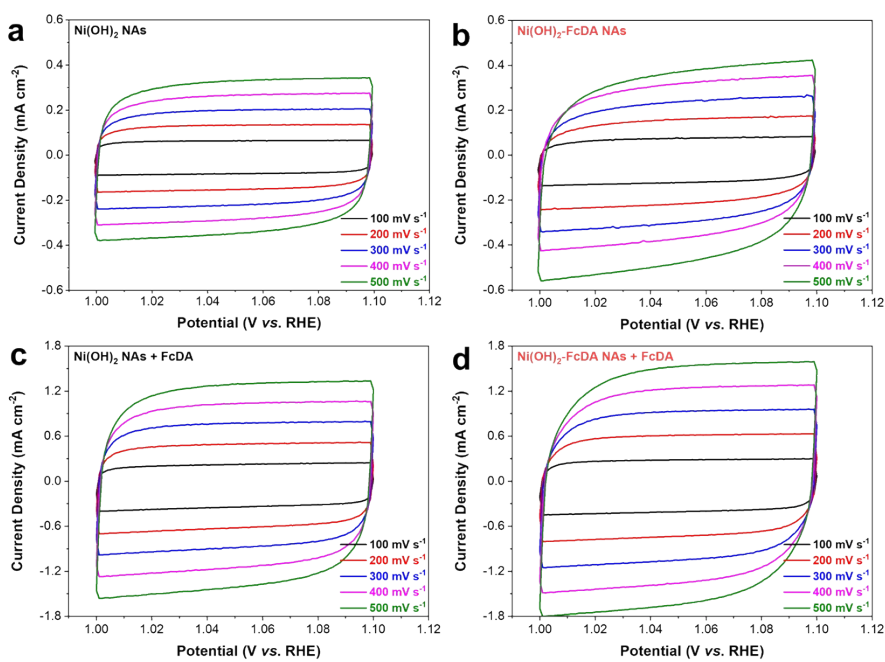

**Figure S8.** CV curves of (a) Ni(OH)<sub>2</sub> NAs, (b) Ni(OH)<sub>2</sub>-FcDA NAs at various scan rates in the electrolyte of KOH solution; CV curves of (c) Ni(OH)<sub>2</sub> NAs and (d) Ni(OH)<sub>2</sub>-FcDA NAs at various scan rates in the electrolyte of FcDA in KOH solution.

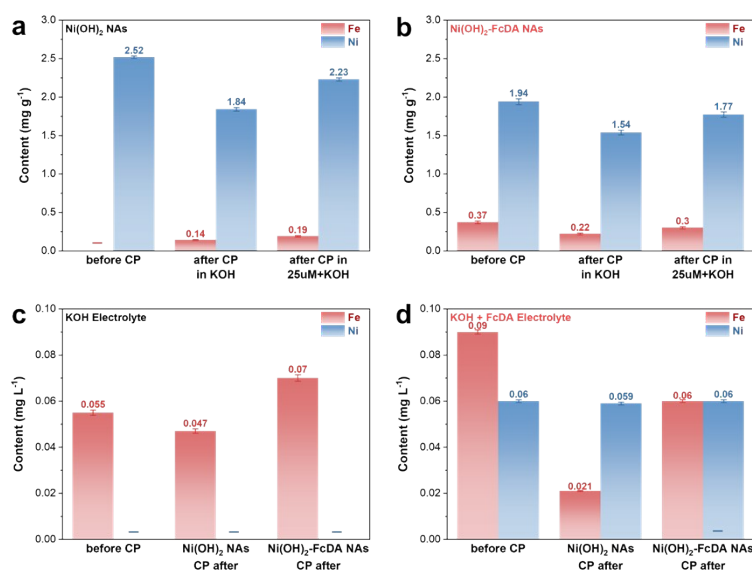

**Figure S9.** Ni and Fe contents in (a) Ni(OH)<sub>2</sub> NAs and (b) Ni(OH)<sub>2</sub>-FcDA NAs electrodes before and after CP tests. (c, d) Concentrations of Ni and Fe leached into the electrolyte after stability testing, as determined by ICP-OES.

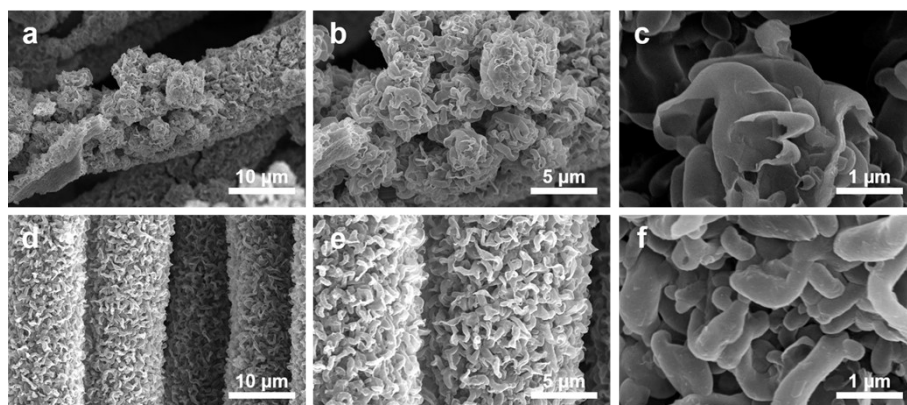

**Figure S10.** SEM images of (a-c) Ni(OH)<sub>2</sub> NAs, and (d-f) Ni(OH)<sub>2</sub>-FcDA NAs after CP test in the electrolyte of KOH solution.

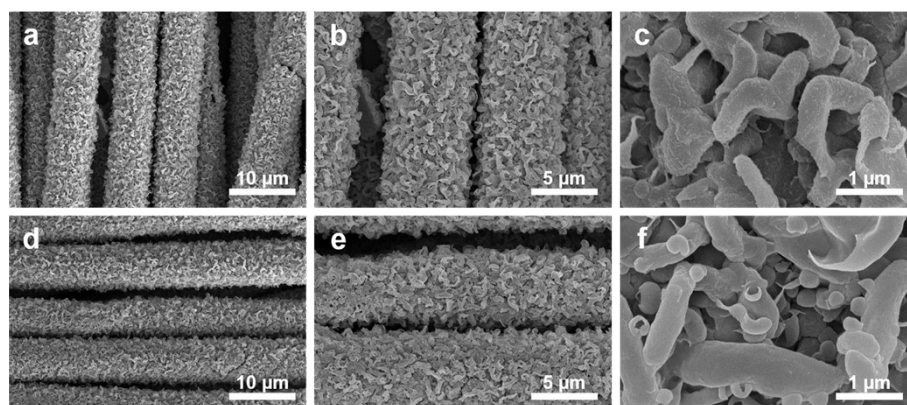

**Figure S11.** SEM images of (a-c) Ni(OH)<sub>2</sub> NAs, and (d-f) Ni(OH)<sub>2</sub>-FcDA NAs after CP test in the electrolyte of 25 μM FcDA in 1 M KOH solution.

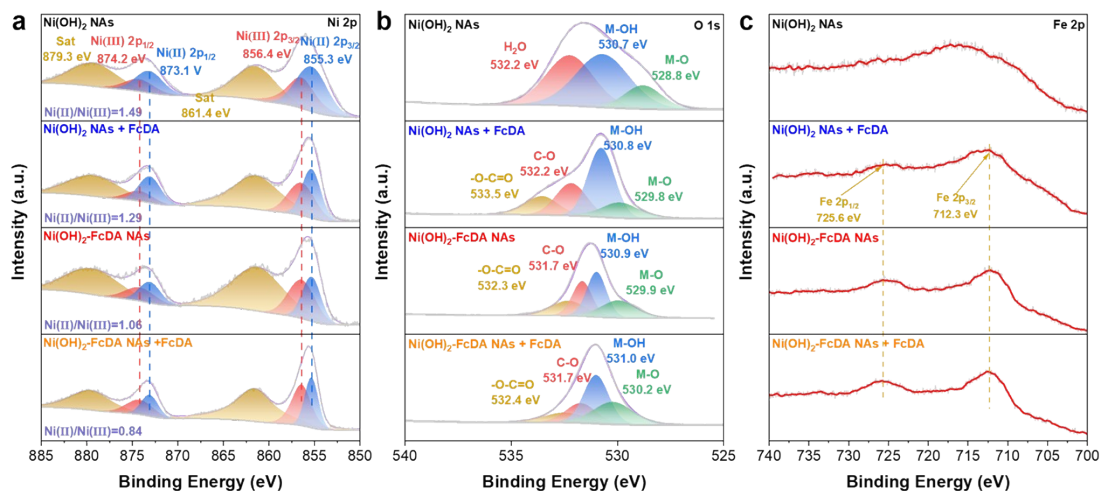

**Figure S12.** XPS of (a) Ni 2p, (b) O 1s and (c) Fe 2p in Ni(OH)<sub>2</sub> NAs and Ni(OH)<sub>2</sub>-FcDA NAs after Sat CP tests in the electrolyte of KOH solution and in the electrolyte of moderate FcDA in KOH solution.

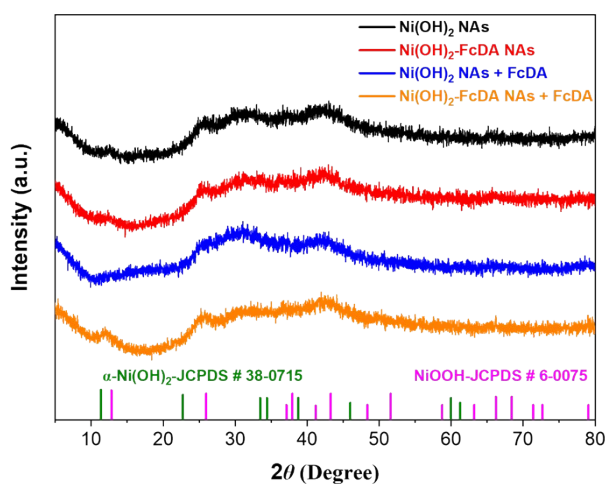

**Figure S13.** XRD of Ni(OH)<sub>2</sub> NAs and Ni(OH)<sub>2</sub>-FcDA NAs after CP test.

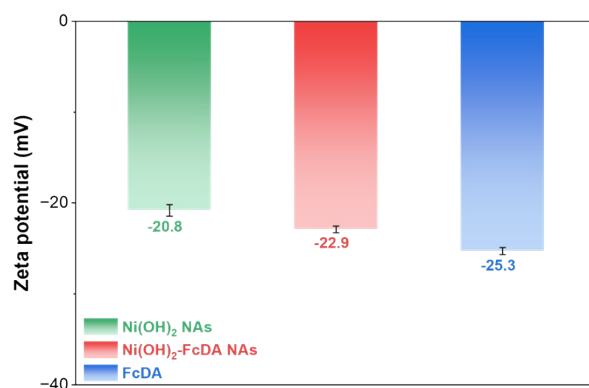

**Figure S14.** The results of zeta potential test of Ni(OH)<sub>2</sub>-FcDA NAs compared with the Ni(OH)<sub>2</sub> NAs and FcDA at pH = 14.

**Table S1.** Comparison of Catalytic OER Performance in Alkaline Electrolytes.

| Electrocatalysts                                                                               | $\eta_{10}$ (mV) | Tafel slope (mV dec <sup>-1</sup> ) | Reference        |
|------------------------------------------------------------------------------------------------|------------------|-------------------------------------|------------------|
| <b>Ni(OH)<sub>2</sub>-FcDA NAs</b>                                                             | <b>203</b>       | <b>38.2</b>                         | <b>This work</b> |
| <b>Ni(OH)<sub>2</sub> NAs + CL</b>                                                             | <b>194</b>       | <b>82.1</b>                         | <b>This work</b> |
| <b>Ni(OH)<sub>2</sub> NAs-FcDA NAs+ CL</b>                                                     | <b>183</b>       | <b>53.2</b>                         | <b>This work</b> |
| Fe-NiSe <sub>2</sub> (V <sub>Se</sub> -Ni <sub>0.70</sub> Fe <sub>0.30</sub> Se <sub>2</sub> ) | 210              | 61                                  | [1]              |
| Ce-NiO-E                                                                                       | 382              | 118.7                               | [2]              |
| NiO-NiFe <sub>2</sub> O <sub>4</sub> /rGO                                                      | 296              | 43                                  | [3]              |
| Sm-NiO-E                                                                                       | 409              | 81                                  | [4]              |
| NiSe <sub>2</sub> @Fe-NiCo LDH                                                                 | 260              | 108.9                               | [5]              |
| Fe-NiSe <sub>2</sub> (Fe <sub>0.2</sub> Ni <sub>0.8</sub> Se <sub>2</sub> )                    | 242              | 68                                  | [6]              |
| Co-NiSe <sub>2</sub> (Co <sub>0.13</sub> Ni <sub>0.87</sub> Se <sub>2</sub> /Ti)               | 320              | 94                                  | [7]              |
| m-Ni <sub>0.94</sub> Fe <sub>0.06</sub> Se <sub>2</sub>                                        | 279              | 39                                  | [8]              |
| Cu-(a-NiSe/c-NiSe <sub>2</sub> )/TiO <sub>2</sub> NRs                                          | 339              | 54.2                                | [9]              |
| Ni <sub>0.7</sub> Fe <sub>0.3</sub> Se <sub>2</sub> -30% rGO                                   | 265              | 57                                  | [10]             |
| Fe-NiSe <sub>2</sub> -25(Fe <sub>0.5</sub> Ni <sub>0.5</sub> Se <sub>2</sub> )                 | 250              | 52                                  | [11]             |
| NiFe(2,2'-bpy) <sub>2</sub> @CNT                                                               | 240              | 42.4                                | [12]             |
| a-CoPSe                                                                                        | 223              | 32                                  | [13]             |
| Fe <sup>2+</sup> -NiFe LDH                                                                     | 249              | 40.3                                | [14]             |
| NiCo <sub>2-x</sub> Fe <sub>x</sub> O <sub>4</sub> NBs                                         | 274              | 42                                  | [15]             |
| 30% Ce-NiFe-LDH                                                                                | 242              | 34                                  | [16]             |
| NiFe LDH-UF                                                                                    | 254              | 32                                  | [17]             |
| HG-NiFe                                                                                        | 310              | 39                                  | [18]             |
| Fe-doped-(Ni-MOFs)/FeOOH                                                                       | 210              | 50                                  | [19]             |
| FeOOH@NiFe LDH(0.2 M )                                                                         | 252              | 51.5                                | [20]             |
| Ni-MIL-53-Fc                                                                                   | 297              | 60.2                                | [21]             |
| NiFe LDH nanomesh                                                                              | 268              | 30                                  | [22]             |
| FeNi LDH sheet/FeNi                                                                            | 130              | 39                                  | [23]             |
| NiFeV LDHs                                                                                     | 192              | 42                                  | [24]             |
| Ni <sub>0.67</sub> Fe <sub>0.33</sub> /C                                                       | 210              | 35                                  | [25]             |
| CoFe LDH HNC                                                                                   | 238              | 42                                  | [26]             |

The table compares the catalytic OER performance of three key systems developed in this work: (1) Ni(OH)<sub>2</sub>-FcDA NAs in 1 M KOH, (2) Ni(OH)<sub>2</sub> NAs in 1 M KOH with

50  $\mu\text{M}$  FcDA additive, and (3)  $\text{Ni}(\text{OH})_2\text{-FcDA}$  NAs in 1 M KOH with 50  $\mu\text{M}$  FcDA additive. Their performance, evaluated by metrics such as the overpotential at 10  $\text{mA cm}^{-2}$  ( $\eta_{10}$ ) and Tafel slope, is benchmarked against other state-of-the-art Ni-based electrocatalysts reported in the literature (Ref S1-S26), with all data obtained in KOH-based electrolytes for a fair comparison.

## Reference

- (1) Hassan, M. H.; Soliman, A. B.; Elmehelme, W. A.; Abugable, A. A.; Karakalos, S. G.; Elbahri, M.; Hassanien, A.; Alkordi, M. H. A Ni-loaded, metal–organic framework–graphene composite as a precursor for *in Situ* electrochemical deposition of a highly active and durable water oxidation nanocatalyst. *Chem. Commun.*, 2019, **55** (1), 31–34.
- (2) Gao, W.; Xia, Z.; Cao, F.; Ho, J. C.; Jiang, Z.; Qu, Y. Comprehensive understanding of the spatial configurations of  $\text{CeO}_2$  in NiO for the electrocatalytic oxygen evolution reaction: embedded or surface-loaded. *Adv. Funct. Mater.*, 2018, **28** (11), 1706056.
- (3) Zhang, G.; Li, Y.; Zhou, Y.; Yang, F. NiFe layered-double-hydroxide-derived NiO– $\text{NiFe}_2\text{O}_4$ /reduced graphene oxide architectures for enhanced electrocatalysis of alkaline water splitting. *ChemElectroChem*, 2016, **3** (11), 1927–1936.
- (4) Aman, S.; Ahmad, N.; Tahir, M. B.; Alanazi, M. M.; Abdelmohsen, S. A. M.; Khosa, R. Y.; Farid, H. M. T. Understanding the spatial configurations of  $\text{Sm}_2\text{O}_3$  in NiO interfaces embedded-loaded for electrocatalytic OER process. *Surf. and Interf.* 2023, **38** (37), 102857.
- (5) Wang, Q.; Wang, C.; Du, X.; Zhang, X. Synthesis of  $\text{NiSe}_2\text{@M}$  (M=Cu, Fe and Zn)–NiCo LDH with porous structure on nickel foam for overall fresh and seawater splitting. *Int. J. Hydrogen. Energy.*, 2024, **51** (15), 1154–1166.
- (6) Zhang, C.; Li, T.; Wei, Q.; Cheng, Z.; Wu, J.; Ma, X.; Chen, Z.; Liu, K.; Zhang, T.; Liu, J. Fe-doped  $\text{NiSe}_2$  nanoparticles as efficient and stable electrocatalysts for oxygen evolution reaction. *Chem. Phys. Lett.*, 2022, **808** (10), 140126.
- (7) Liu, T.; Asiri, A. M.; Sun, X. Electrodeposited Co-doped  $\text{NiSe}_2$  nanoparticles film: a good electrocatalyst for efficient water splitting. *Nanoscale*, 2016, **8** (7), 3911–3915.
- (8) Zhou, J.; Yuan, L.; Wang, J.; Song, L.; You, Y.; Zhou, R.; Zhang, J.; Xu, J. Combinational modulations of  $\text{NiSe}_2$  nanodendrites by phase engineering and iron-doping towards an efficient oxygen evolution reaction. *J. Mater. Chem. A.*, 2020, **8** (16), 8113–8120.
- (9) Park, K. R.; Tran, D. T.; Nguyen, T. T.; Kim, N. H.; Lee, J. H. Copper-incorporated heterostructures of amorphous  $\text{NiSe}_x$ /crystalline  $\text{NiSe}_2$  as an efficient electrocatalyst for overall water splitting. *Chem. Eng. J.*, 2021, **422** (77), 130048.
- (10) Zhu, M.; Yan, Q.; Lu, Q.; Xue, Y.; Yan, Y.; Yin, J.; Zhu, K.; Cheng, K.; Ye, K.; Yan, J.; Cao, D.; Wang, G. Iron-doped  $\text{NiSe}_2$  in-situ grown on graphene as an efficient electrocatalyst for oxygen evolution reaction. *J. Electroanal. Chem.*, 2020, **866** (22), 114134.
- (11) Xuan, C.; Xu, Q.; Han, L.; Hou, B. Electronic structure exquisite modulation of  $\text{NiSe}_2$  interface via rationally controlling Fe doping for boosting electrochemical oxygen evolution activity. *Chem. Eng. J.*, 2023, **464** (31), 142620.

- (12) Zhou, H.; Hao, X.; Guan, J.; Deng, Y.; Wei, Z.; Liu, Y.; Zhu, G. Coordination tuning of Ni/Fe complex-based electrocatalysts for enhanced oxygen evolution. *Inorg. Chem. Front.*, 2024, **11** (22), 8110–8122.
- (13) Shi, Y.; Zhou, S.; Liu, J.; Zhang, X.; Yin, J.; Zhan, T.; Yang, Y.; Li, G.; Lai, J.; Wang, L. An integrated amorphous cobalt phosphoselenide electrocatalyst with high mass activity boosts alkaline overall water splitting. *Appl. Catal. B.*, 2024, **341** (58), 123326.
- (14) Cai, Z.; Zhou, D.; Wang, M.; Bak, S.; Wu, Y.; Wu, Z.; Tian, Y.; Xiong, X.; Li, Y.; Liu, W.; Siahrostami, S.; Kuang, Y.; Yang, X.; Duan, H.; Feng, Z.; Wang, H.; Sun, X. Introducing Fe<sup>2+</sup> into nickel–iron layered double hydroxide: local structure modulated water oxidation activity. *Angew. Chem., Int. Ed.*, 2018, **57** (30), 9392–9396.
- (15) Huang, Y.; Zhang, S. L.; Lu, X. F.; Wu, Z.; Luan, D.; Lou, X. W. (David). Trimetallic spinel NiCo<sub>2-x</sub>Fe<sub>x</sub>O<sub>4</sub> nanoboxes for highly efficient electrocatalytic oxygen evolution. *Angew. Chem., Int. Ed.*, 2021, **60** (21), 11841–11846.
- (16) Xu, H.; Shan, C.; Wu, X.; Sun, M.; Huang, B.; Tang, Y.; Yan, C.-H. Fabrication of layered double hydroxide microcapsules mediated by cerium doping in metal–organic frameworks for boosting water splitting. *Energy. Environ. Sci.*, 2020, **13** (9), 2949–2956.
- (17) Zhao, Y.; Zhang, X.; Jia, X.; Waterhouse, G. I. N.; Shi, R.; Zhang, X.; Zhan, F.; Tao, Y.; Wu, L.; Tung, C.; O’Hare, D.; Zhang, T. Sub-3 nm ultrafine monolayer layered double hydroxide nanosheets for electrochemical water oxidation. *Adv. Energy Mater.*, 2018, **8** (18), 1703585.
- (18) Wang, J.; Gan, L.; Zhang, W.; Peng, Y.; Yu, H.; Yan, Q.; Xia, X.; Wang, X. In situ formation of molecular Ni-Fe active sites on heteroatom-doped graphene as a heterogeneous electrocatalyst toward oxygen evolution. *Sci. Adv.*, 2018, **4** (3), eaap7970.
- (19) Li, C.; Xie, L.; Zhao, J.; Gu, L.; Tang, H.; Zheng, L.; Li, G. Interfacial Fe-O-Ni-O-Fe bonding regulates the active Ni Sites of Ni-MOFs via iron doping and decorating with FeOOH for super-efficient oxygen evolution. *Angew. Chem., Int. Ed.*, 2022, **61** (17), e202116934.
- (20) Li, Y.; Wu, Y.; Yuan, M.; Hao, H.; Lv, Z.; Xu, L.; Wei, B. Operando Spectroscopies Unveil Interfacial FeOOH induced highly reactive β-Ni(Fe)OOH for efficient oxygen evolution. *Appl. Catal. B.*, 2022, **318** (180), 121825.
- (21) Xu, Z.; Tao, Y.; Sun, Z.; Bi, P.; Zhong, X.; Liao, J.; Hao, D.; Yang, L.; Xu, L.; Luo, M.; Pan, K.; Gao, Z. Ligand-engineered Ni-based metal–organic frameworks for electrochemical oxygen evolution reaction. *Chem. Eng. J.*, 2023, **478** (5), 147418.
- (22) Xiang, Q.; Li, F.; Chen, W.; Ma, Y.; Wu, Y.; Gu, X.; Qin, Y.; Tao, P.; Song, C.; Shang, W.; Zhu, H.; Deng, T.; Wu, J. In situ vertical growth of Fe–Ni layered double-hydroxide arrays on Fe–Ni alloy foil: interfacial layer enhanced electrocatalyst with small overpotential for oxygen evolution reaction. *ACS. Energy, Lett.*, 2018, **3** (10), 2357–2365.
- (23) Xie, J.; Xin, J.; Wang, R.; Zhang, X.; Lei, F.; Qu, H.; Hao, P.; Cui, G.; Tang, B.; Xie, Y. Sub-3 nm pores in two-dimensional nanomesh promoting the generation of electroactive phase for robust water oxidation. *Nano. Energy.*, 2018, **53** (113), 74–82.
- (24) Li, P.; Duan, X.; Kuang, Y.; Li, Y.; Zhang, G.; Liu, W.; Sun, X. Tuning electronic structure of NiFe layered double hydroxides with vanadium doping toward high efficient electrocatalytic water oxidation. *Adv. Energy. Mater.*,

- 2018, **8** (15), 1703341.
- (25) Yin, S.; Tu, W.; Sheng, Y.; Du, Y.; Kraft, M.; Borgna, A.; Xu, R. A highly efficient oxygen evolution catalyst consisting of interconnected nickel–iron-layered double hydroxide and carbon nanodomains. *Adv. Mater.*, 2018, **30** (5), 1705106.
- (26) Ni, Y.; Shi, D.; Mao, B.; Wang, S.; Wang, Y.; Ahmad, A.; Sun, J.; Song, F.; Cao, M.; Hu, C. Under-coordinated CoFe layered double hydroxide nanocages derived from nanoconfined hydrolysis of bimetal organic compounds for efficient electrocatalytic water oxidation. *Small*, 2023, **19** (45), 2302556.
